# Supplementary material for: Diversity of the Bacterial Microbiome Associated With the Endosphere and Rhizosphere of Different Cassava (Manihot esculenta Crantz) Genotypes
Source: PubMed Central journal article supplement (PMC8515189; doi:10.3389/fmicb.2021.729022), 2021-09-30

FIGURE S1 | The rarefaction curves of tuber and rhizosphere samples of different cassava genotypes.

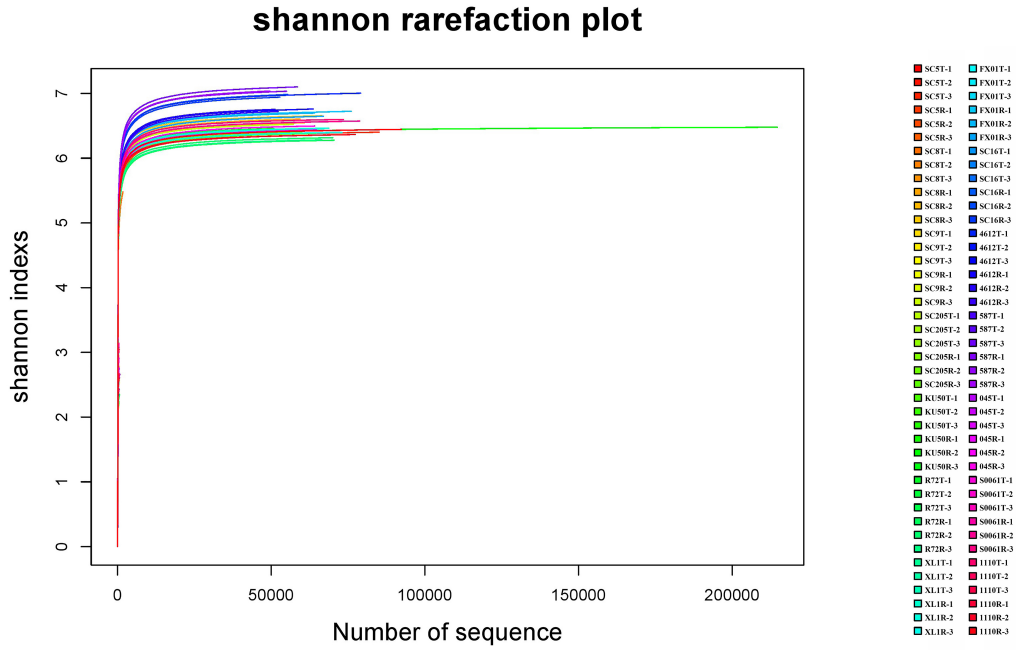

FIGURE S2 | Bar diagram of the linear discriminant analysis (LDA) distribution (LDA score threshold:  $\geq 2$ ) with rhizosphere soil bacterial communities.

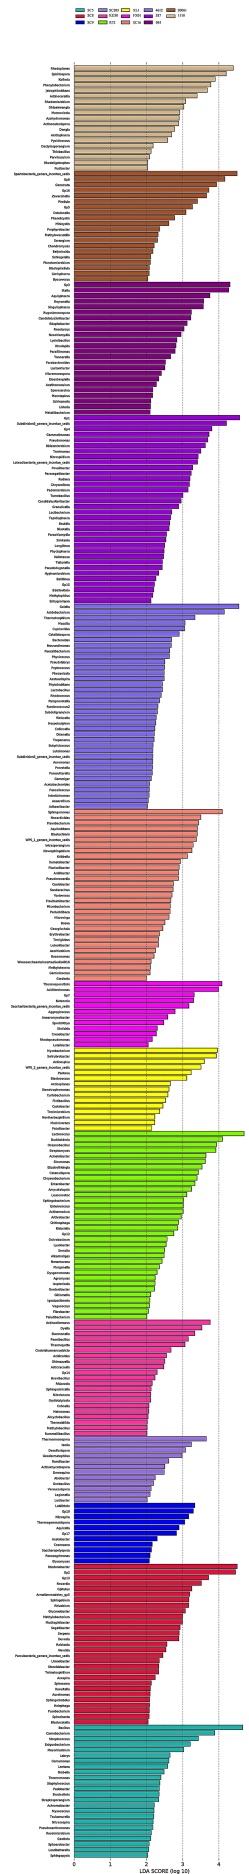

FIGURE S3 | (A) Unsupervised PCA diagrams of three cassava cultivars. Stacked column chart of the percentage of metabolites playing a biological role (B) and the Top 20 metabolite percentages (C) of three cassava cultivars. (D) The importance map of OPLS-DA metabolites of three cassava cultivars. The metabolites in the yellow area were significantly different between groups ( $P < 0.05$ ,  $VIP > 1$ ).

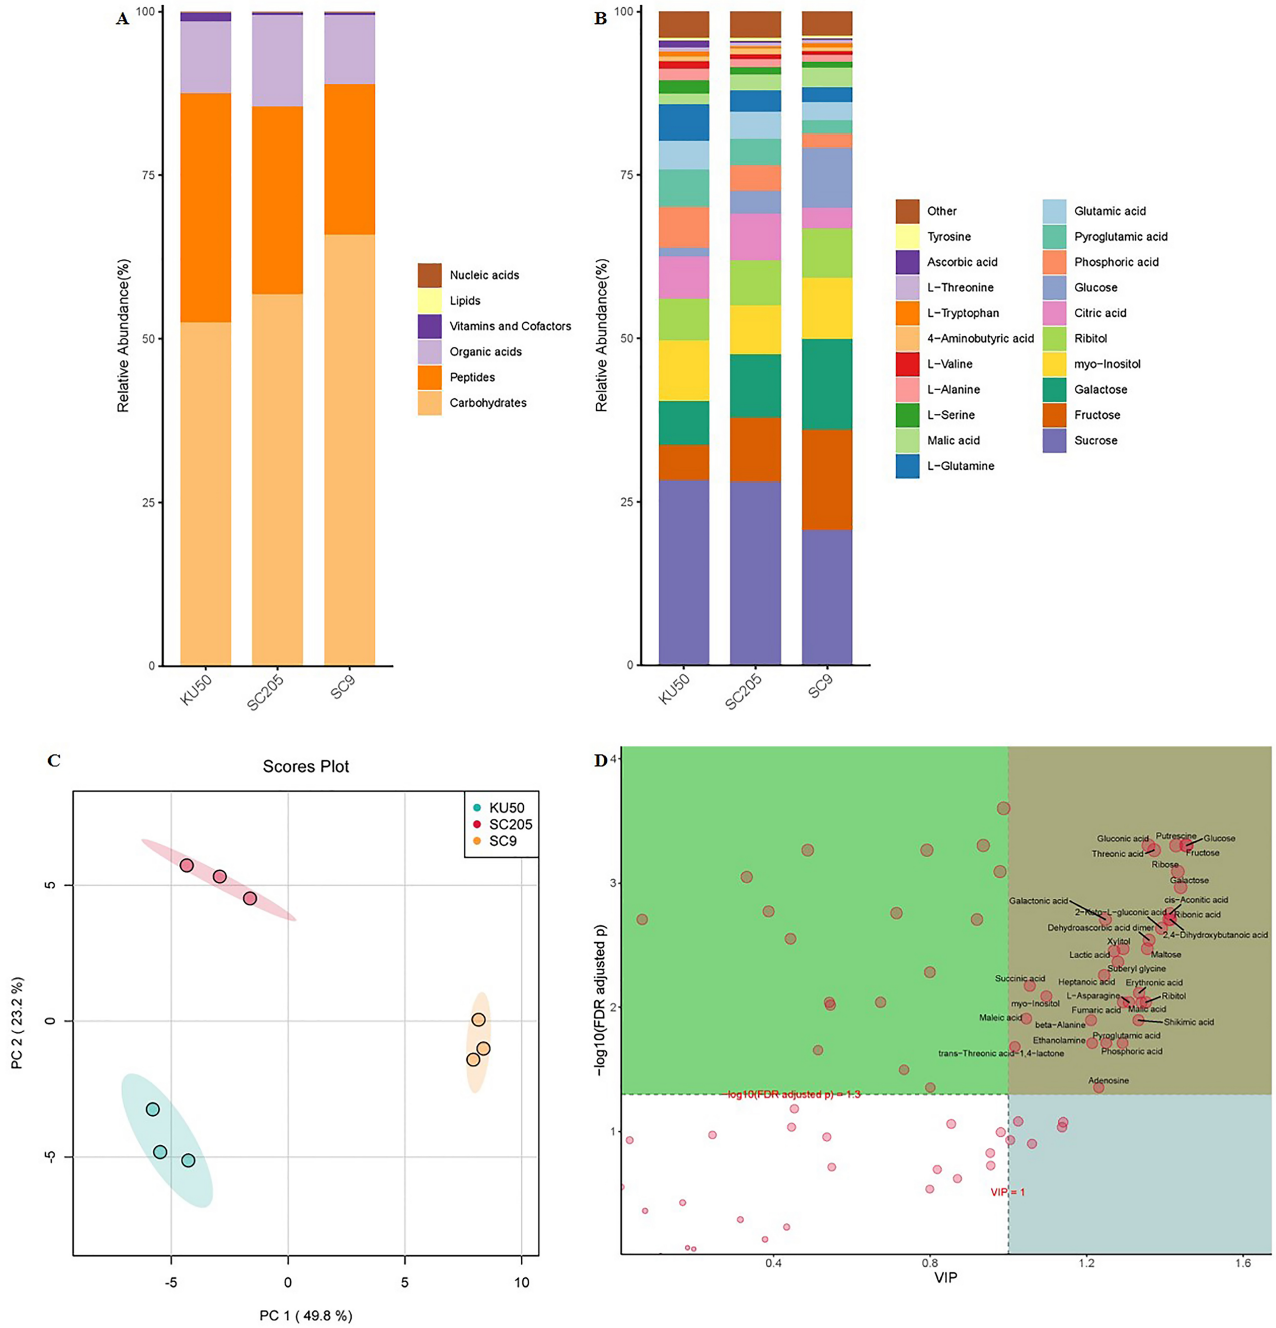

Supplement: Presentation_1.pdf [file Presentation_1.pdf]
